# Supplementary material for: Multi‐Arm PEG/Peptidomimetic Conjugate Inhibitors of DR6/APP Interaction Block Hematogenous Tumor Cell Extravasation
Source: PubMed Central journal article supplement (PMC8188212; doi:10.1002/advs.202003558), 2021-03-18
Supplement: ADVS-8-2003558-s001.pdf [file ADVS-8-2003558-s001.pdf]

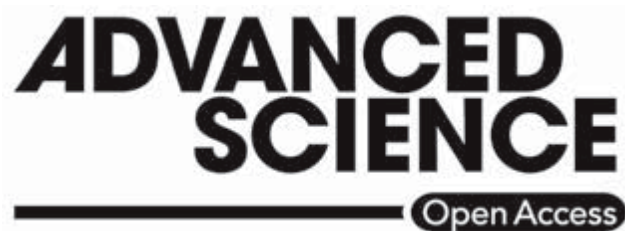

## Supporting Information

for *Adv. Sci.*, DOI: 10.1002/adv.202003558

### **Multi-Arm PEG/Peptidomimetic Conjugate Inhibitors of DR6/APP**

#### **Interaction Block Hematogenous Tumor Cell Extravasation**

*Liting Wang, Qing Shen, Hongze Liao, \* Hao Fu, Qi Wang, Jian Yu, Wei Zhang,*

*Chuanrong Chen, Yang Dong, Xupeng Yang, Qianqian Guo, Jiali Zhang, Jian*

*Zhang, Wei Zhang, Houwen Lin, \* and Yourong Duan\**

## Supporting Information

### Multi-Arm PEG/Peptidomimetic Conjugate Inhibitors of DR6/APP

#### Interaction Block Hematogenous Tumor Cell Extravasation

*Liting Wang, Qing Shen, Hongze Liao, \* Hao Fu, Qi Wang, Jian Yu, Wei Zhang, Chuanrong Chen, Yang Dong, Xupeng Yang, Qianqian Guo, Jiali Zhang, Jian Zhang, Wei Zhang, Houwen Lin, \* and Yourong Duan\**

Dr. L. Wang, Dr. Q. Shen, Dr. H. Fu, Dr. J. Yu, Dr. W. Zhang, Dr. C. Chen, Dr. Y. Dong, X. Yang, Dr. Q. Guo, Dr. J. Zhang, Prof. H. Lin, Prof. Y. Duan

State Key Laboratory of Oncogenes and Related Genes, Shanghai Cancer Institute, School of Biomedical Engineering, Renji Hospital, School of Medicine, Shanghai Jiao Tong University, Shanghai 200032, China.

E-mail: yrduan@shsci.org; franklin67@126.com

Dr. H. Liao, Prof. W. Zhang, Prof. H. Lin

Research Center for Marine Drugs, State Key Laboratory of Oncogenes and Related Genes, Department of Pharmacy, Renji Hospital, School of Medicine, Shanghai Jiao Tong University, Shanghai 200127, China.

E-mail: lhzseed@live.com or

Dr. Q. Wang

Shanghai Key Laboratory of Functional Materials Chemistry, School of Chemistry and Molecular Engineering, East China University of Science and Technology, Shanghai 200237, China.

Prof. J. Zhang

Department of Pathophysiology, Key Laboratory of Cell Differentiation and Apoptosis of Ministry of Education, Shanghai Jiao Tong University School of Medicine, Shanghai 200025, China.

**Table S1.** Amino acid sequences of twenty-four peptides and the corresponding  $K_D$  values. <sup>a</sup>

| ID     | Sequence | $K_D \pm SEM^b$<br>(nM) |
|--------|----------|-------------------------|
| AHP-01 | WTLSINS  | $1153.7 \pm 7.94$       |
| AHP-02 | FQFRLQS  | NB <sup>c</sup>         |
| AHP-03 | YLPAPLP  | $688.5 \pm 11.20$       |
| AHP-04 | ANLLYES  | NB                      |
| AHP-05 | YYSGNNL  | $1096 \pm 10.04$        |
| AHP-06 | KLGPVCP  | NB                      |
| AHP-07 | YSLHASP  | NB                      |
| AHP-08 | HSTAPQL  | NB                      |
| AHP-09 | KLVPEPS  | NB                      |
| AHP-10 | NGSTHER  | $527.8 \pm 12.09$       |
| AHP-11 | GFSHYFP  | NB                      |
| AHP-12 | TIDATTP  | $321.8 \pm 11.24$       |
| AHP-13 | SHTDTNQ  | $1153.7 \pm 7.94$       |
| AHP-14 | AFMYSLP  | $457.3 \pm 11.56$       |
| AHP-15 | TIPKYER  | NB                      |
| AHP-16 | KFLQVTN  | NB                      |
| AHP-17 | HSYPYTQ  | NB                      |
| AHP-18 | TTYMPKM  | NB                      |
| AHP-19 | MPPFRHD  | NB                      |
| AHP-20 | LPRSPLA  | NB                      |
| AHP-21 | AGHFSLW  | NB                      |
| AHP-22 | LMTTKSD  | NB                      |
| AHP-23 | GGLSMTR  | $4458.8 \pm 5.85$       |
| AHP-24 | NHQRLLP  | $1093.5 \pm 262$        |

<sup>a</sup>  $K_D$  values of peptides to DR6 were assessed as described in the Materials and Methods.

<sup>b</sup>  $K_D$  values shown are the average of three independent experiments in triplicate.

<sup>c</sup> NB = No binding.

**Table S2.** Amino acid sequences of D-peptides and DRI-peptides and the corresponding  $K_D$  values.

| ID         | Sequence    | $K_D \pm \text{SEM}$<br>(nM) |
|------------|-------------|------------------------------|
| AHP-D-03   | D-(YLPAPLP) | $4734.0 \pm 8.80$            |
| AHP-D-10   | D-(NGSTHER) | $27110.0 \pm 47383$          |
| AHP-D-12   | D-(TIDATTP) | $55130.0 \pm 27585$          |
| AHP-D-13   | D-(SHTDTNQ) | $3174 \pm 8.80$              |
| AHP-DRI-03 | D-(PLPAPLY) | $1219 \pm 7.02$              |
| AHP-DRI-10 | D-(REHTSGN) | $17810 \pm 37081$            |
| AHP-DRI-12 | D-(PTTADIT) | $225.19 \pm 4.30$            |
| AHP-DRI-13 | D-(QNTDTHS) | $862.7 \pm 6.59$             |

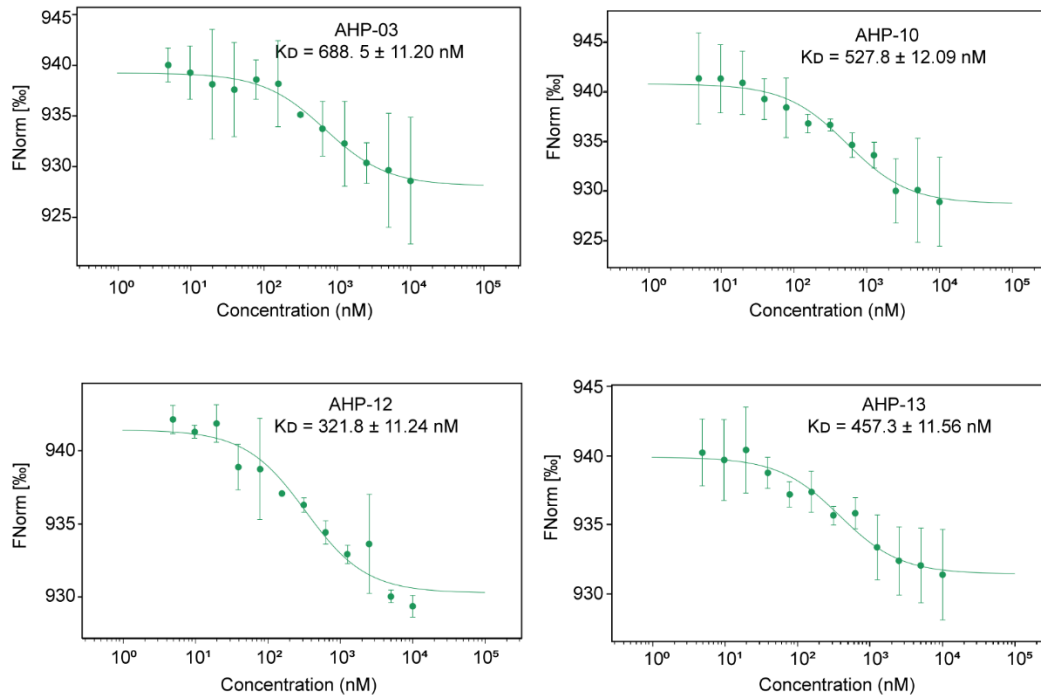

**Figure S1.** The binding curve of AHP-03, AHP-10, AHP-12 and AHP-13 to DR6 protein were measured by MST, respectively.

A

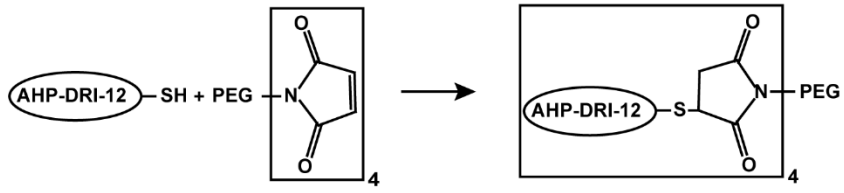

B

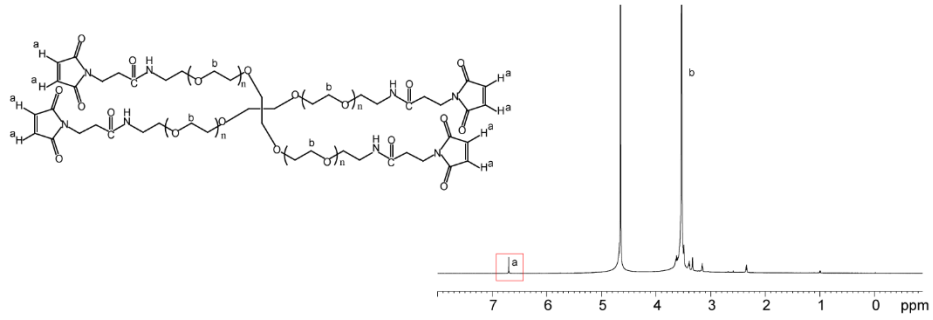

C

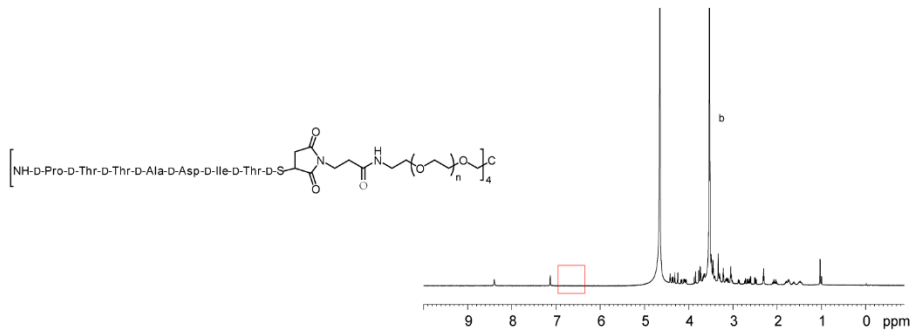

D

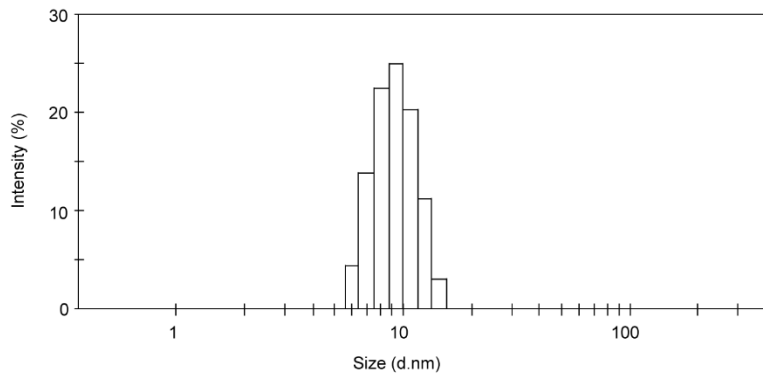

E

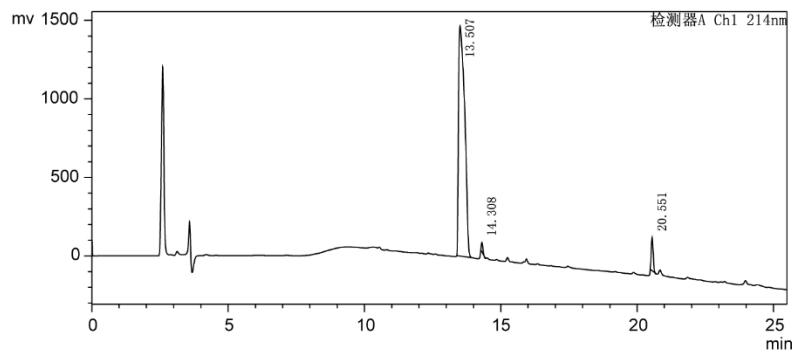

**Figure S2. Synthesis of PEG-tAHP-DRI.** **A)** Schematic presentation of PEG-tAHP-DRI. **B)**  $^1\text{H}$  NMR spectra of 4-arm-PEG<sub>5k</sub> in D<sub>2</sub>O. **C)**  $^1\text{H}$  NMR spectra of PEG-tAHP-DRI in D<sub>2</sub>O. **D)** Size distribution of PEG-tAHP-DRI. **E)** HPLC curve of PEG-tAHP-DRI.

A

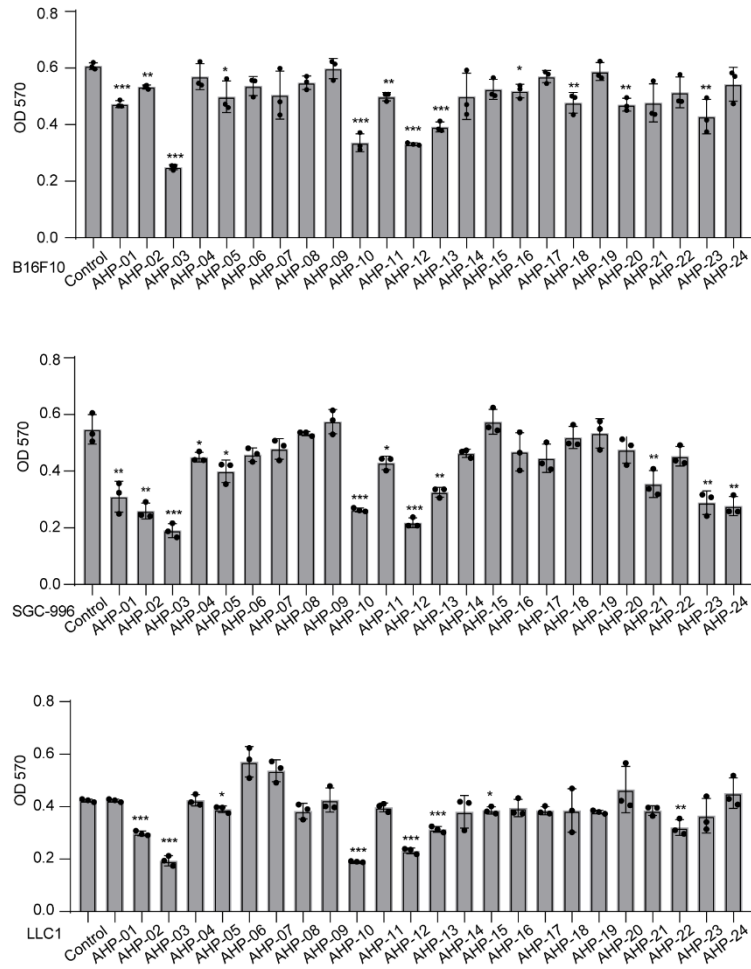

B

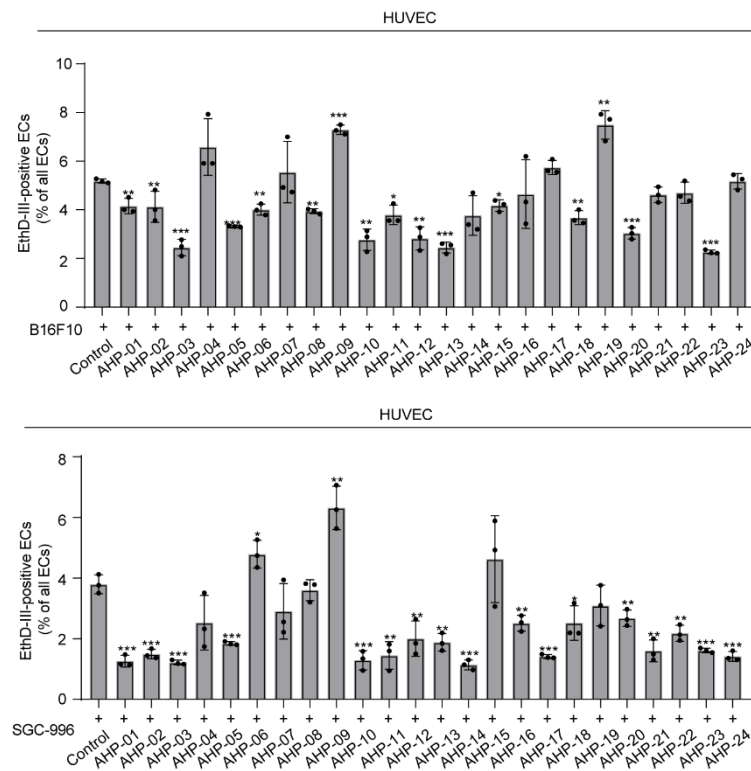



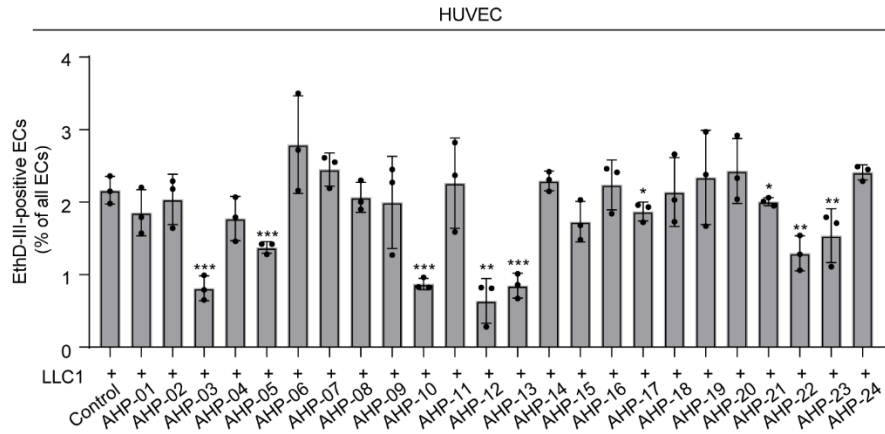

**Figure S3. Screening of twenty-four DR6-targeting peptides. A)** Cell attachment of different TCs to culture plate coated with DR6 protein after treated twenty-four peptides. **B)** HUVECs necroptosis when co-cultured with different TCs after treated with twenty-four peptides. Data are means  $\pm$  SD (n = 3), and analyzed with GraphPad Prism 8.0. \*P < 0.05, \*\*P < 0.01, \*\*\*P < 0.005 calculated by unpaired two-tailed Student's t-test. NS indicates P > 0.05.

A

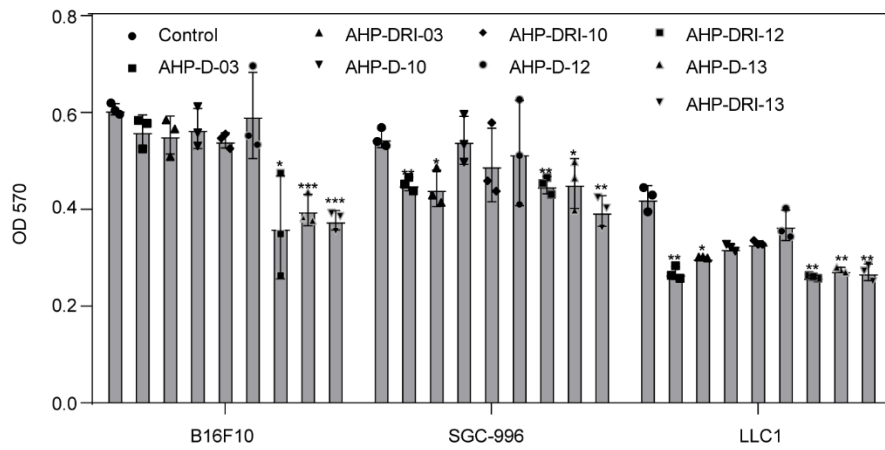

B

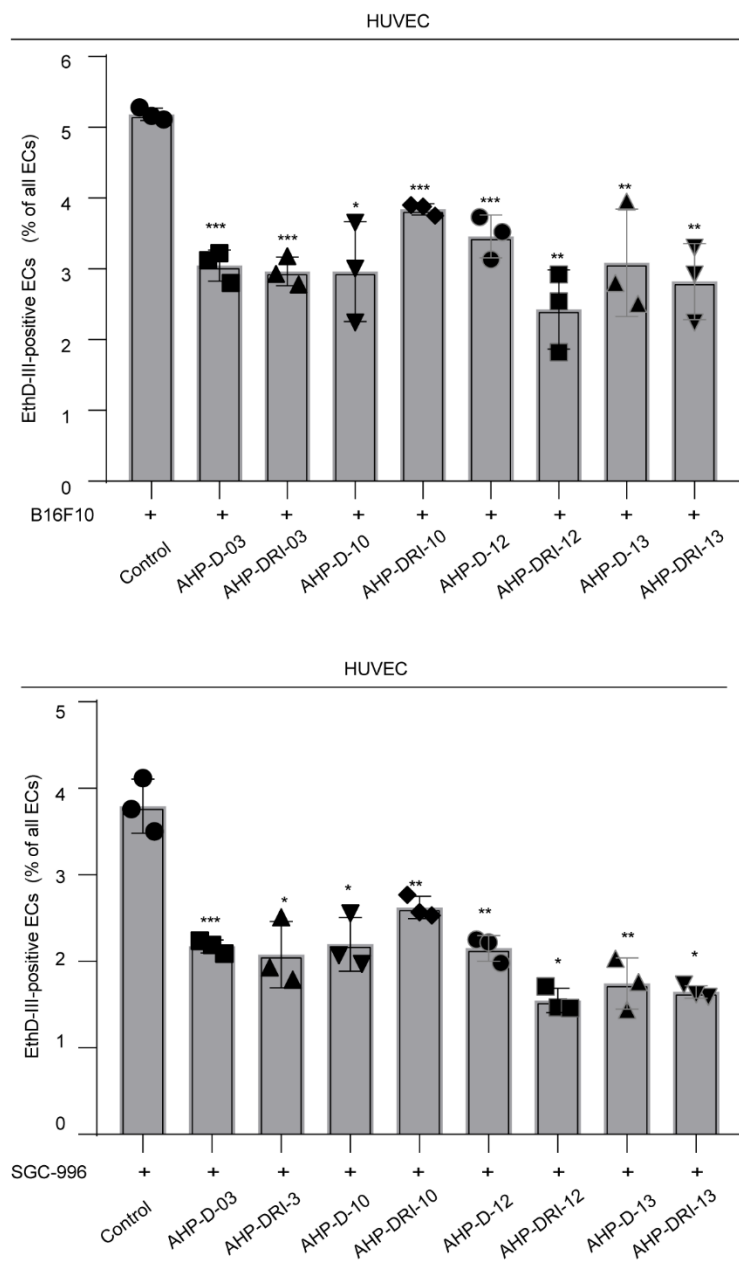

C

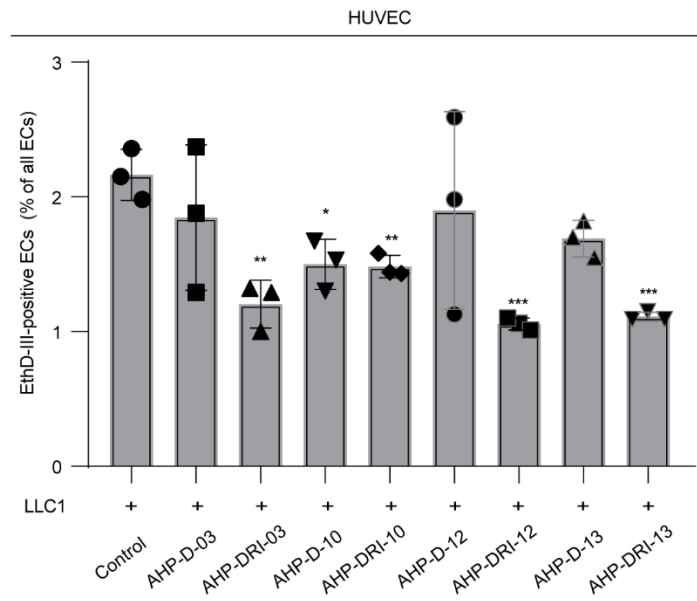

**Figure S4. Screening of D-peptides and DRI-peptides.** **A)** Cell attachment of different TCs to culture plate coated with DR6 protein after treated with eight peptides. **B)** HUVECs necroptosis when co-cultured with different TCs after treated with eight peptides. Data are means  $\pm$  SD ( $n = 3$ ), and analyzed with GraphPad Prism 8.0. \* $P < 0.05$ , \*\* $P < 0.01$ , \*\*\* $P < 0.005$  calculated by unpaired two-tailed Student's t-test. NS indicates  $P > 0.05$ .

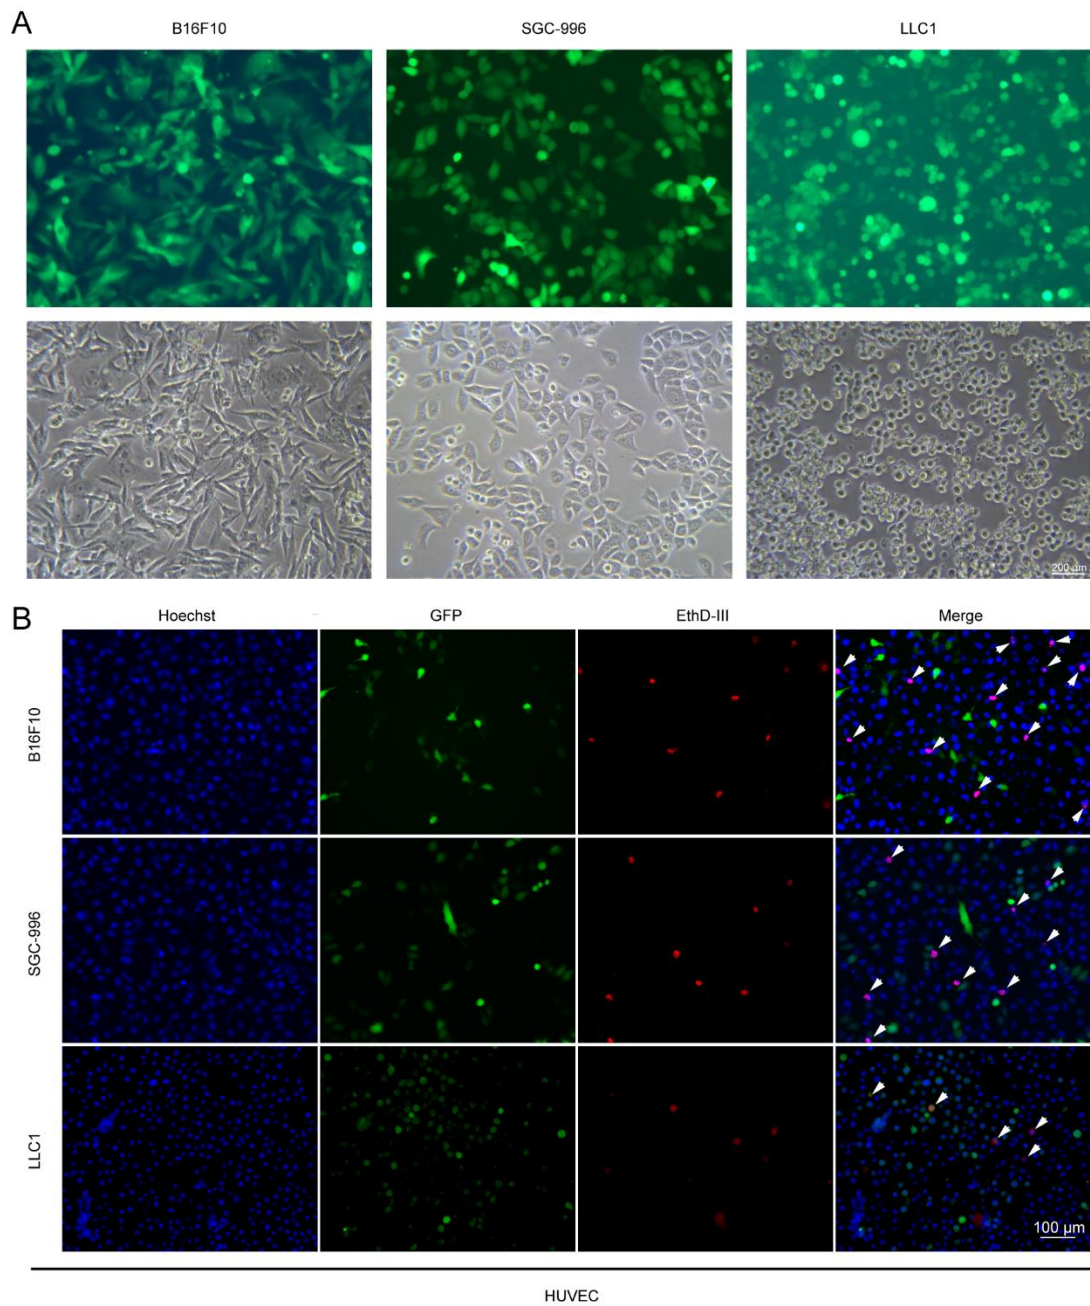

**Figure S5. A)** B16F10, SGC-996, LLC1 cells stably expressed GFP. **B)** Fluorescent images of HUVECs cultured in the presence of GFP-TCs (green) and stained as indicated. Arrowheads, EthD-III-positive HUVECs (red).

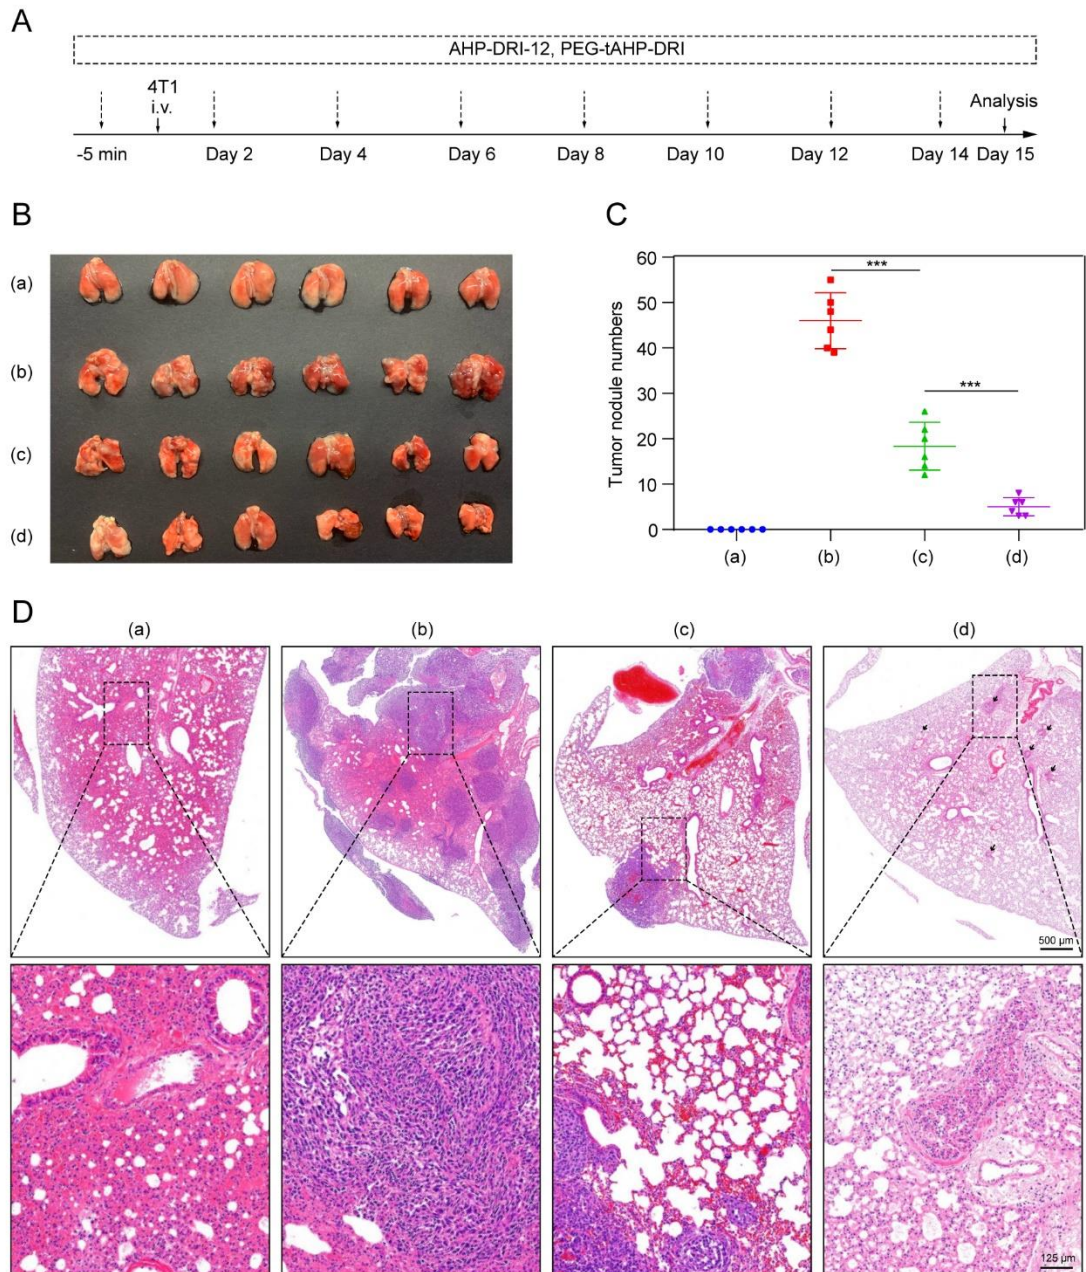

**Figure S6.** **A**) Experimental design. **B**) Photographs of the lungs 15 days after i.v. injection of 4T1. (a) saline, (b) 4T1 + saline (vehicle), (c) 4T1 + AHP-DRI-12, (d) 4T1 + PEG-tAHP-DRI. **C**) Metastasis nodules of lungs were quantified. **D**) H&E staining of lung sections. Data are means  $\pm$  SD ( $n = 6$ ), and analyzed with GraphPad Prism 8.0. \* $P < 0.05$ , \*\* $P < 0.01$ , \*\*\* $P < 0.005$  calculated by unpaired two-tailed Student's t-test. NS indicates  $P > 0.05$ .

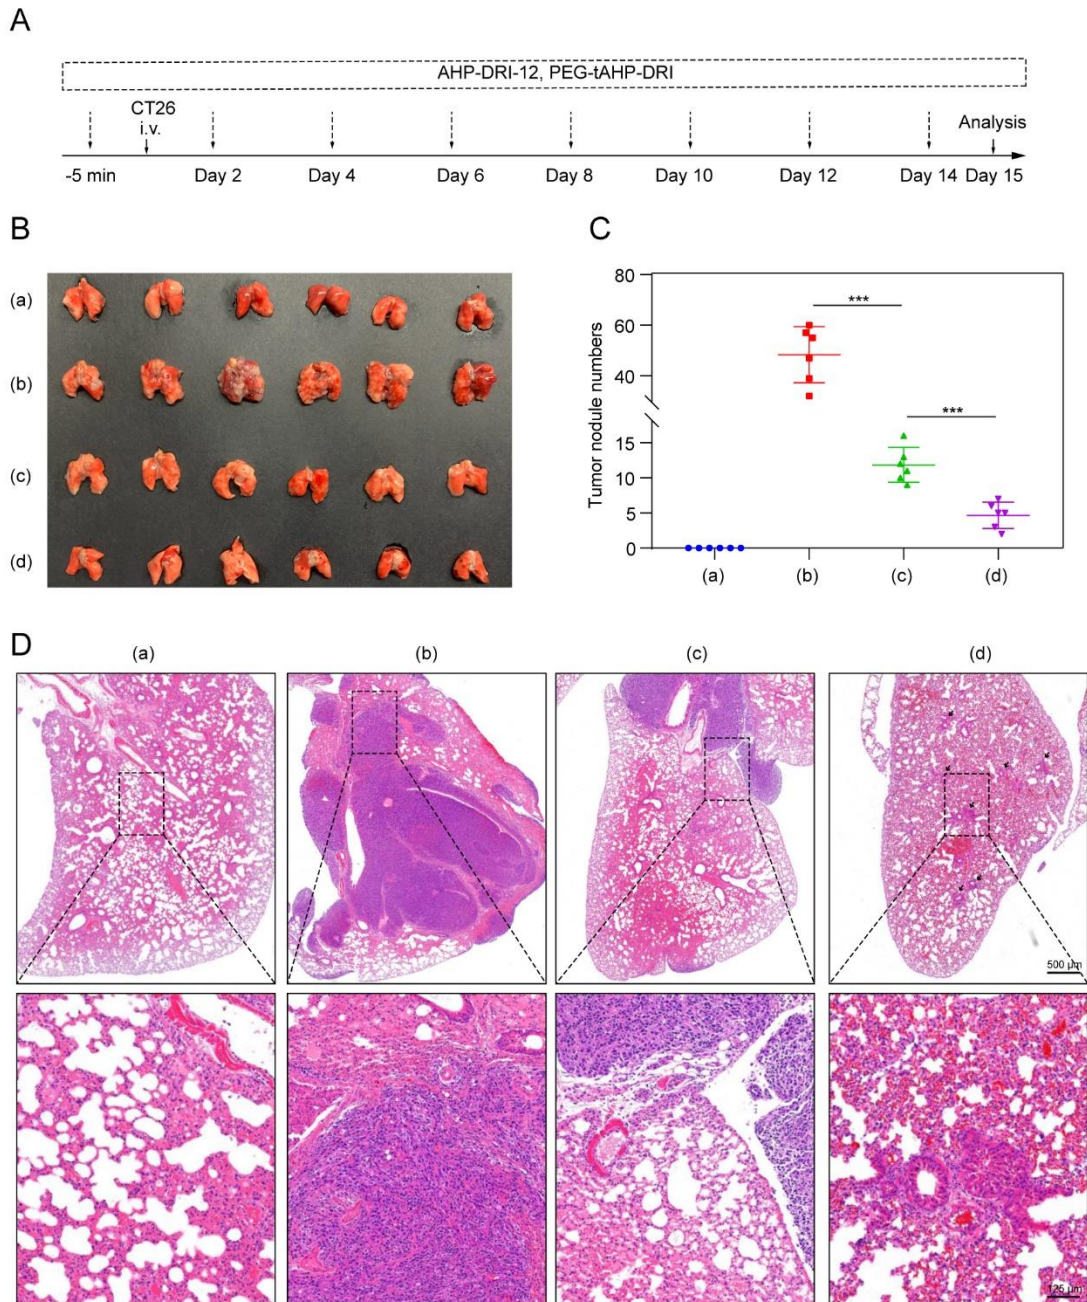

**Figure S7.** **A**) Experimental design. **B**) Photographs of the lungs 15 days after i.v. injection of CT26. (a) saline, (b) CT26 + saline (vehicle), (c) CT26 + AHP-DRI-12, (d) CT26 + PEG-tAHP-DRI. **C**) Metastasis nodules of lungs were quantified. **D**) H&E staining of lung sections. Data are means  $\pm$  SD ( $n = 6$ ), and analyzed with GraphPad Prism 8.0. \* $P < 0.05$ , \*\* $P < 0.01$ , \*\*\* $P < 0.005$  calculated by unpaired two-tailed Student's t-test. NS indicates  $P > 0.05$ .

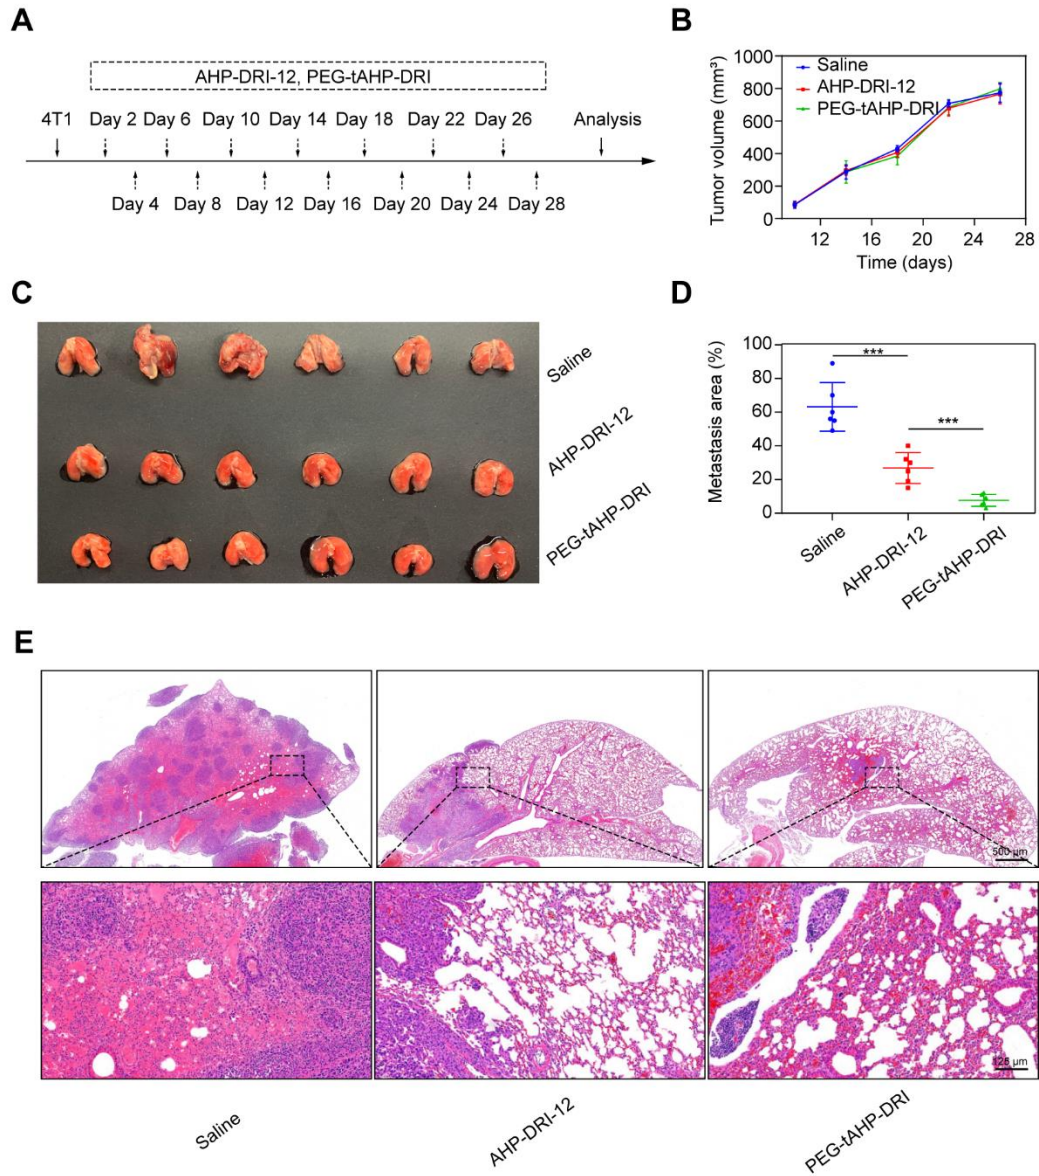

**Figure S8.** **A)** Experimental design. **B)** Orthotopic tumor growth of 4T1. **C)** Photographs of the lungs 30 days after 4T1 injection. **D)** Metastasis areas of lungs were quantified. **E)** H&E staining of lung sections. Data are means  $\pm$  SD ( $n = 6$ ), and analyzed with GraphPad Prism 8.0. \* $P < 0.05$ , \*\* $P < 0.01$ , \*\*\* $P < 0.005$  calculated by unpaired two-tailed Student's  $t$ -test. NS indicates  $P > 0.05$ .

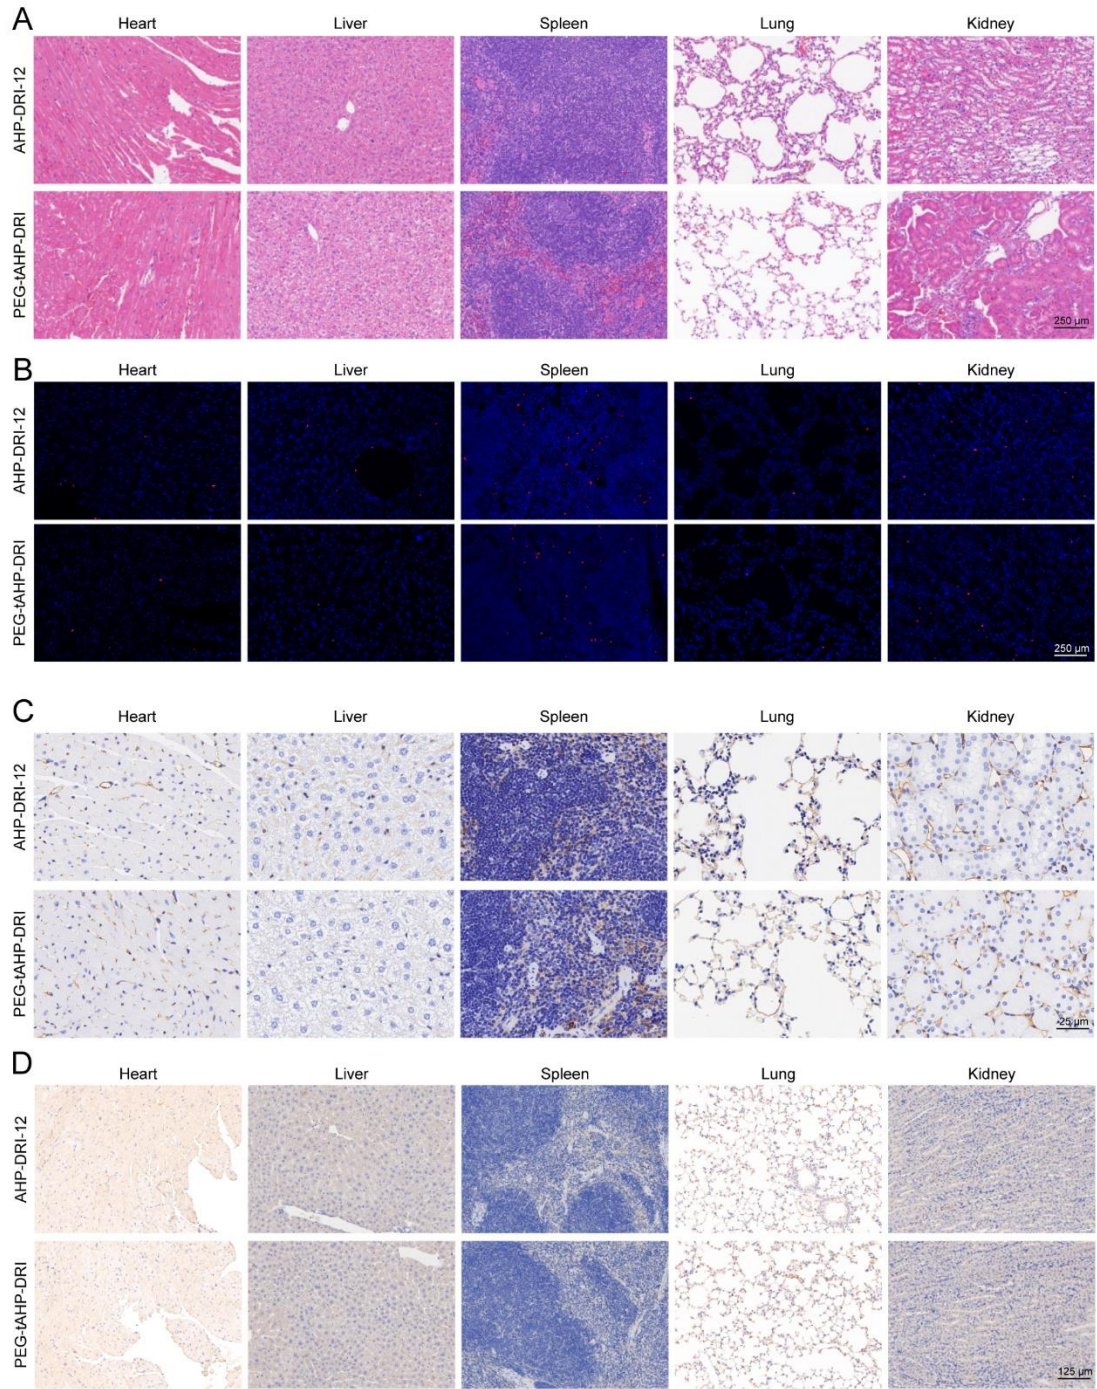



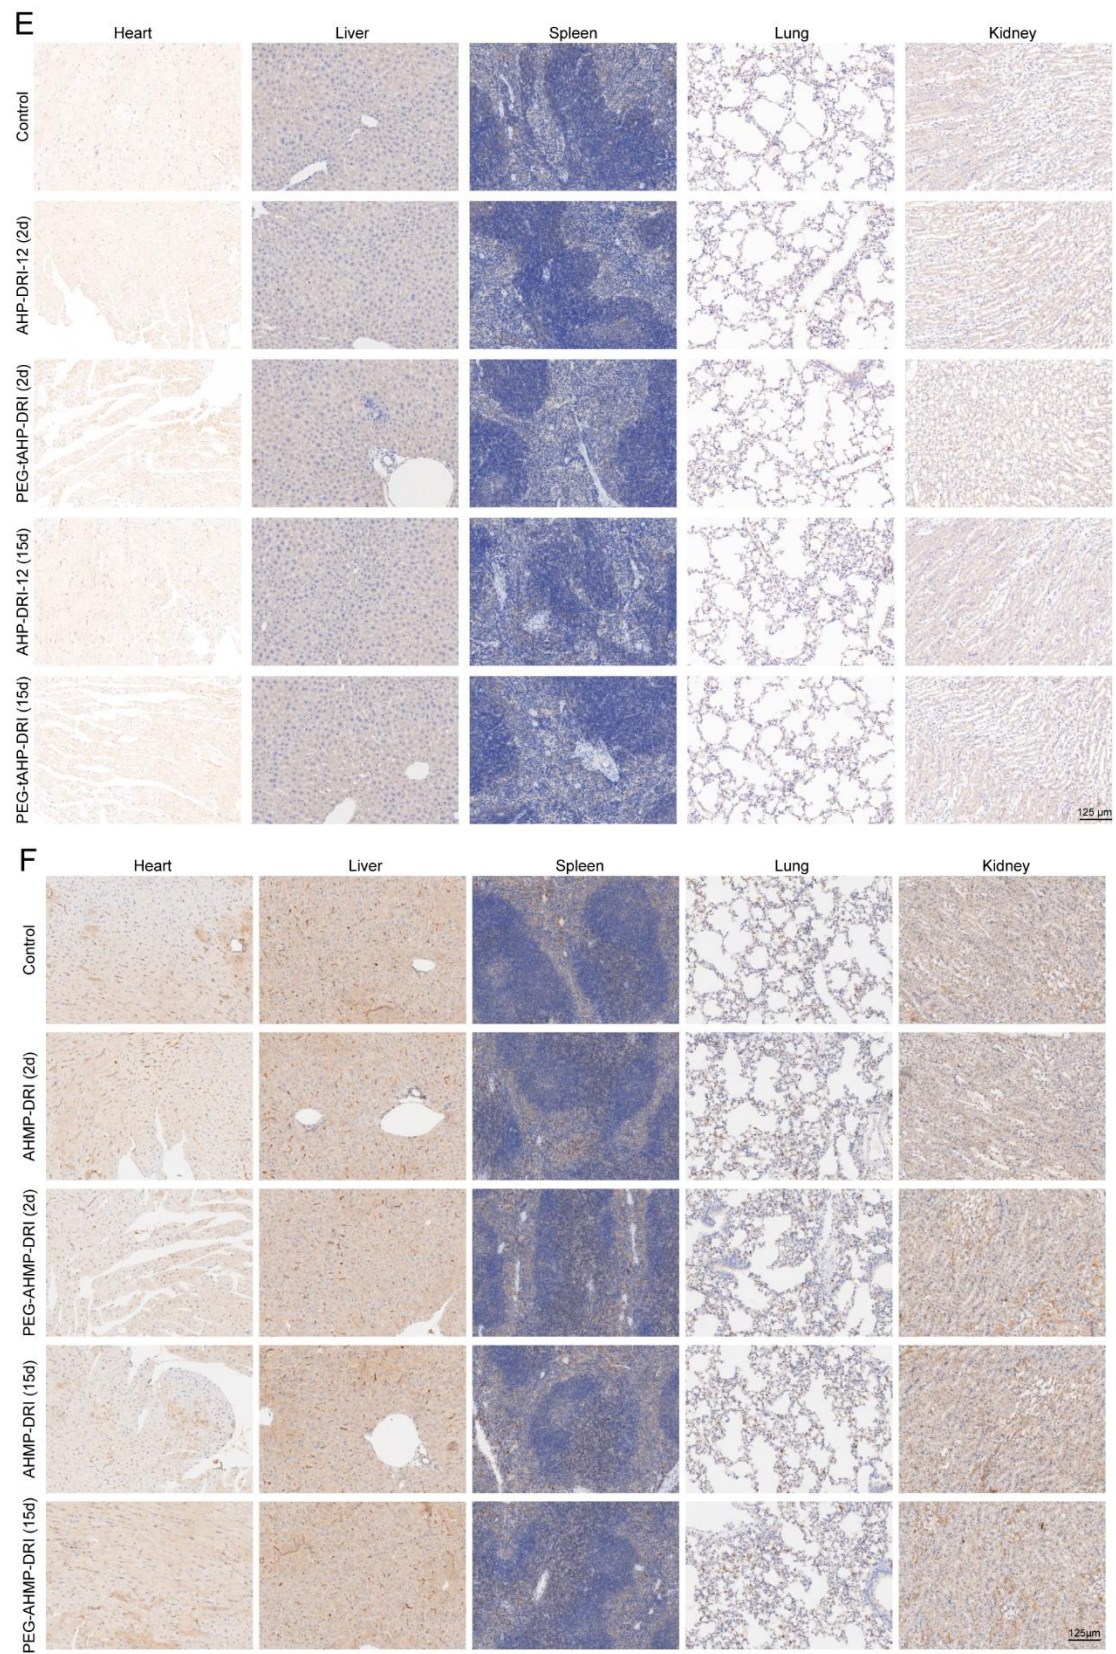

**Figure S9. A, B)** Tissue sections (heart, liver, spleen, lung and kidney) of healthy mice 2 days after injected with AHP-DRI-12 or PEG-tAHP-DRI were stained with H&E (**A**) and TUNEL (**B**). **C, D)** Tissue

sections (heart, liver, spleen, lung and kidney) of healthy mice 2 days after injected with AHP-DRI-12 or PEG-tAHP-DRI were stained with CD31 (C) and p-RIPK1 (D). E, F) Tissue sections (heart, liver, spleen, lung and kidney) of healthy mice 2 days and 15 days after injected with AHP-DRI-12 or PEG-tAHP-DRI were stained with p-IkB- $\alpha$  (E) and caspase 8 (F).

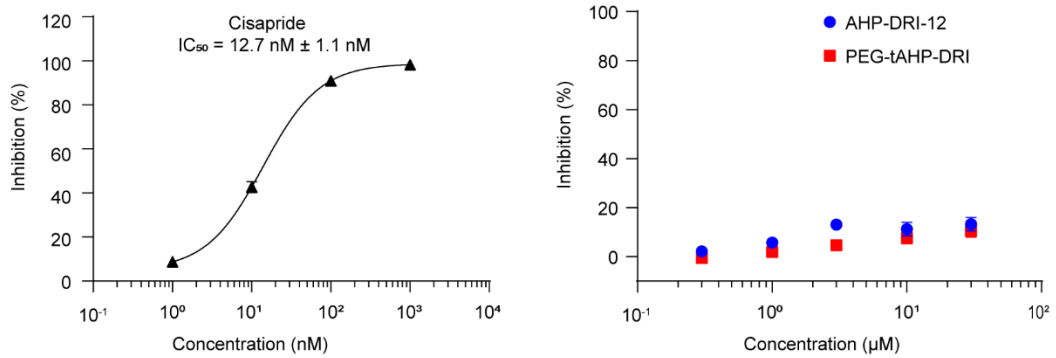

**Figure S10.** Current change of hERG induced by cisapride, AHP-DRI-12 or PEG-tAHP-DRI.

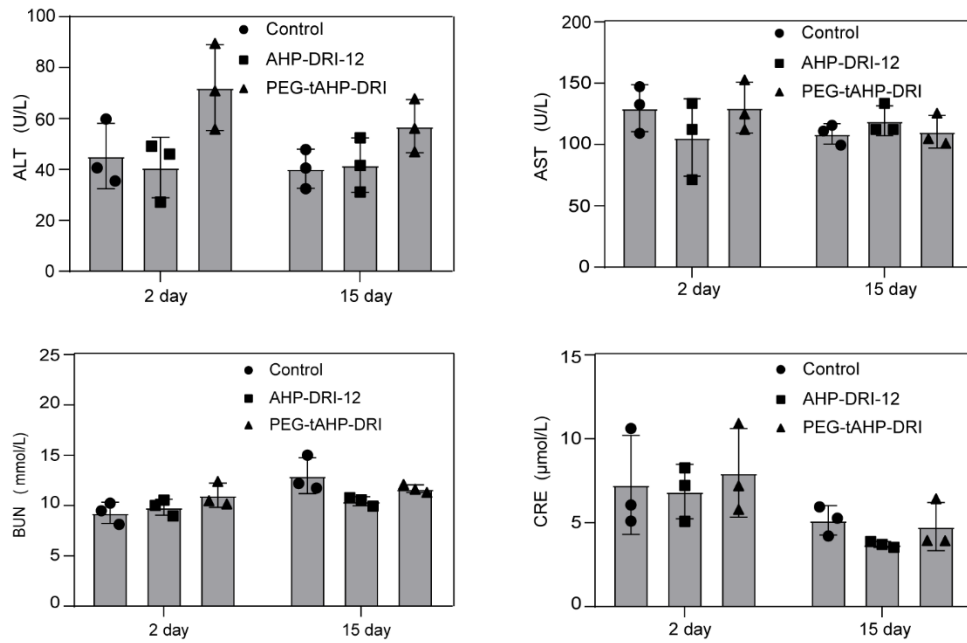

**Figure S11.** Serum ALT, AST, BUN and CRE levels after i.v. injection of AHP-DRI-12 and PEG-tAHP-DRI. Data are means  $\pm$  SD (n = 3), and analyzed with GraphPad Prism 8.0. \*P < 0.05, \*\*P < 0.01, \*\*\*P < 0.005 calculated by unpaired two-tailed Student's t-test. NS indicates P > 0.05.

AHP-01: WTLSINS

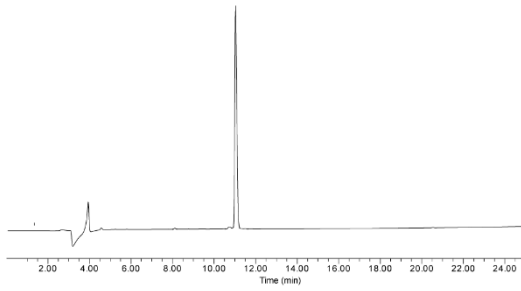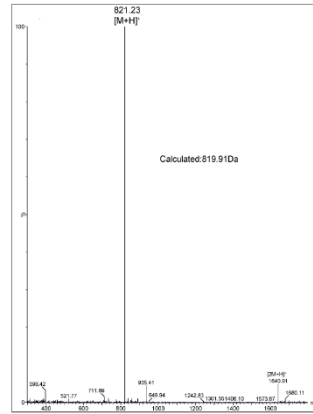

AHP-02: FQFRLQS

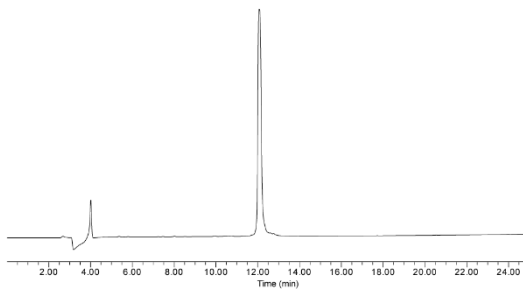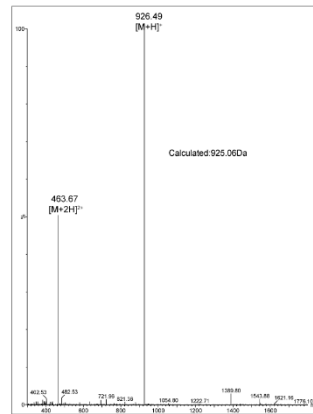

AHP-03: YLPAPLP

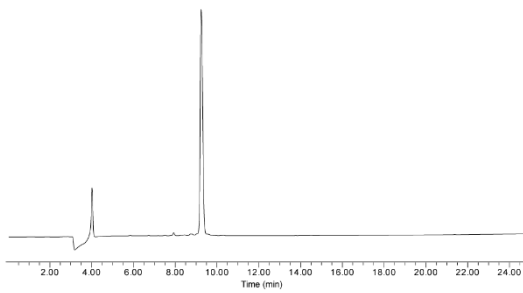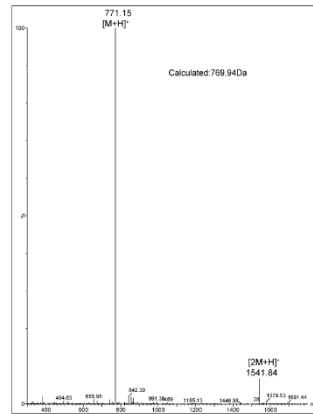

AHP-04: ANLLYES

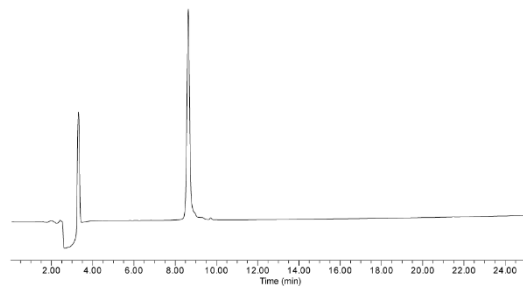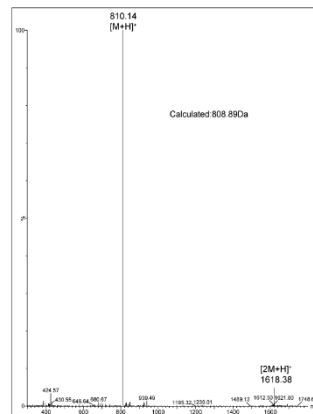

AHP-05: YYSGNL

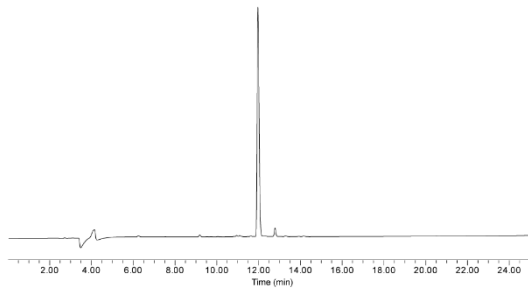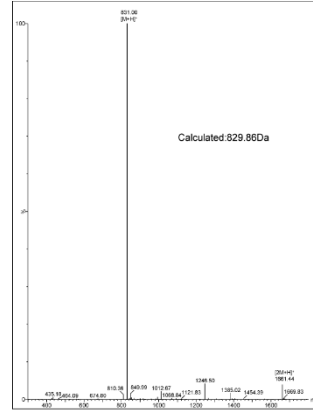

AHP-06: KLGVCVP

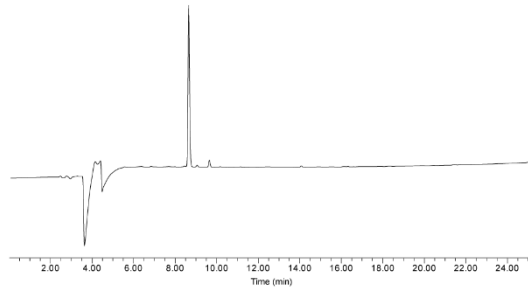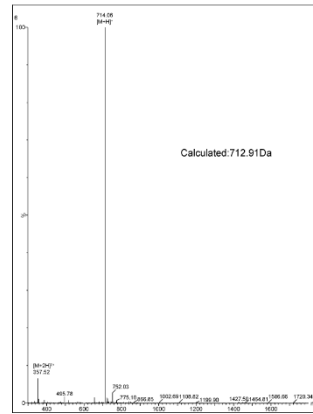

AHP-07: YSLHASP

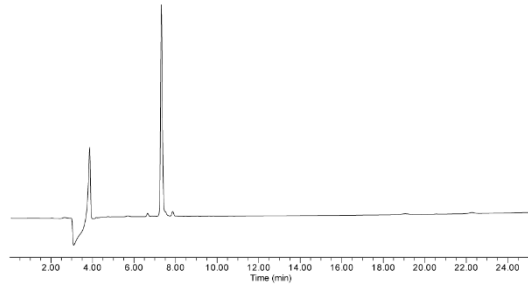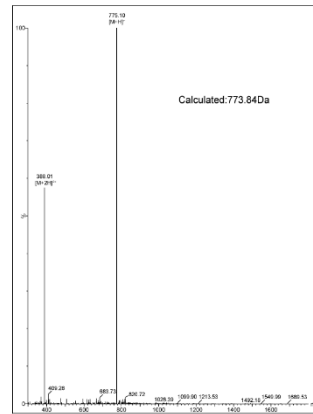

AHP-08: HSTAPQL

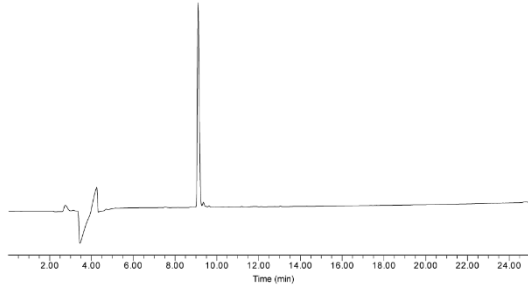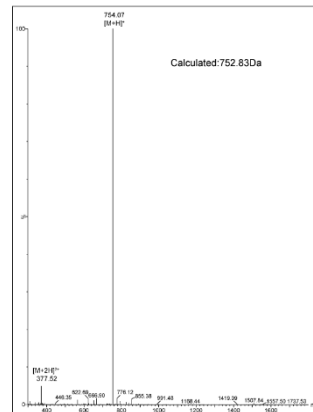

AHP-09: KLVPEPS

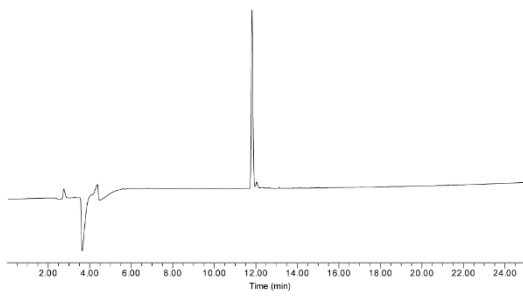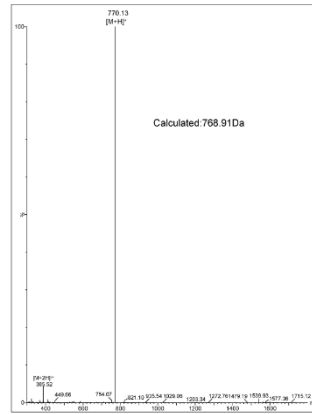

AHP-10: NGSTHER

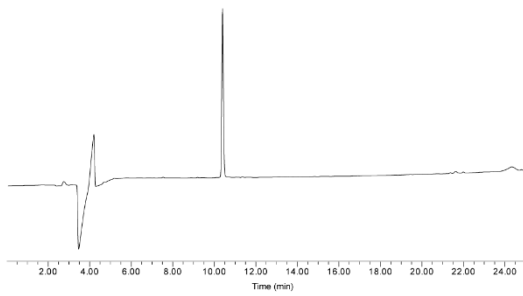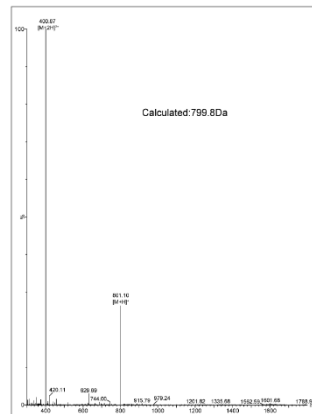

AHP-11: GFSHYFP

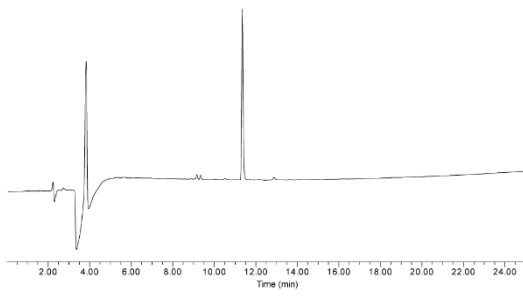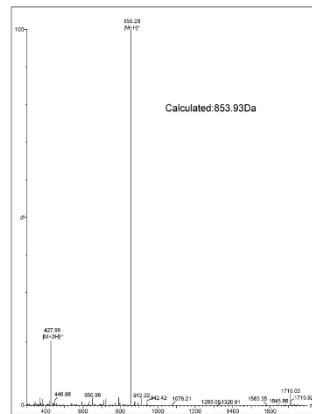

AHP-12: TIDATTP

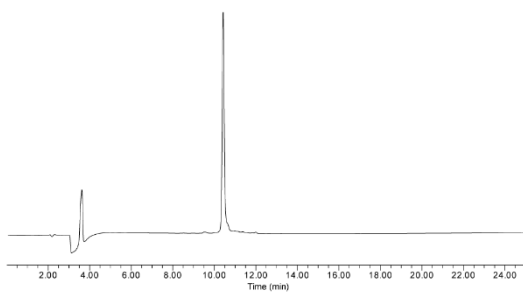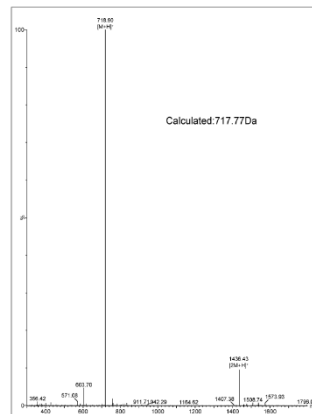



AHP-17: HSYPTYQ

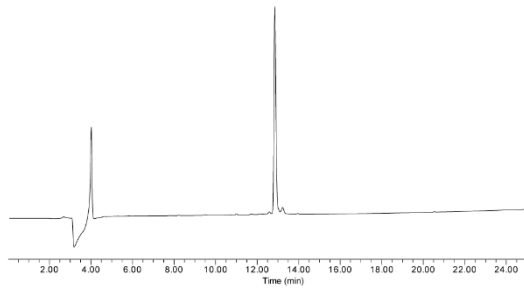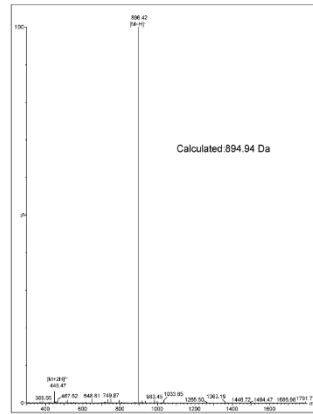

AHP-18: TTYMPKM

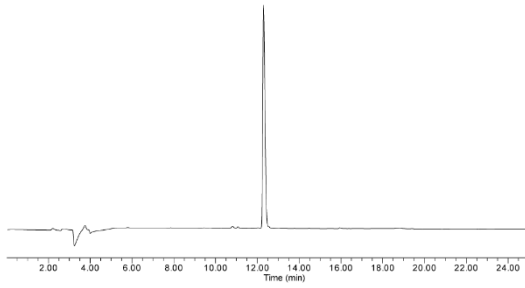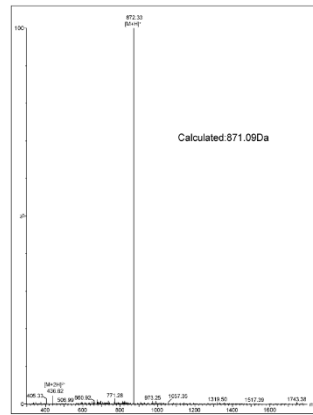

AHP-19: MPPFRHD

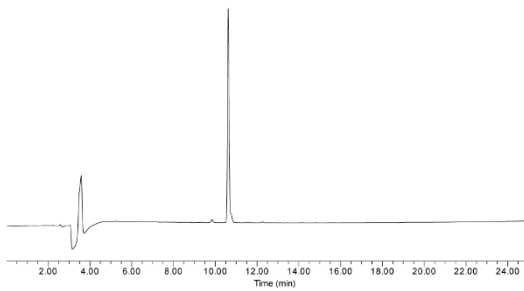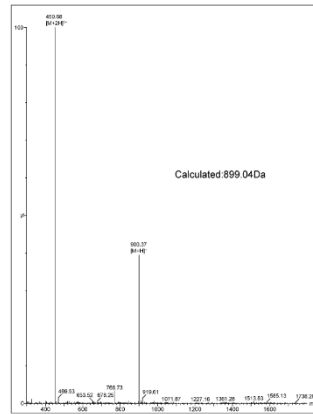

AHP20: LPRSPLA

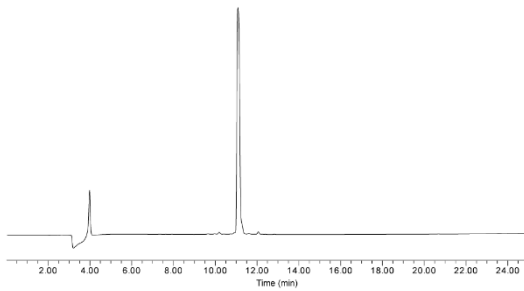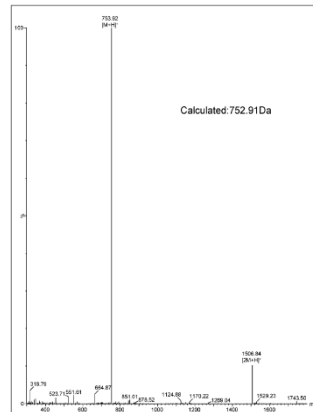



AHP-21: AGHFLW

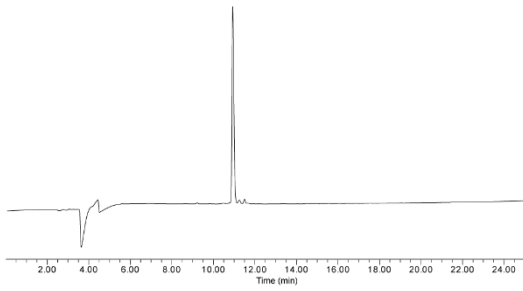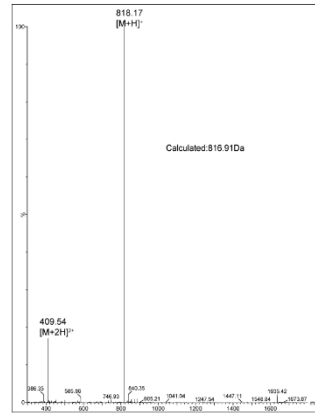

AHP-22: LMTTKSD

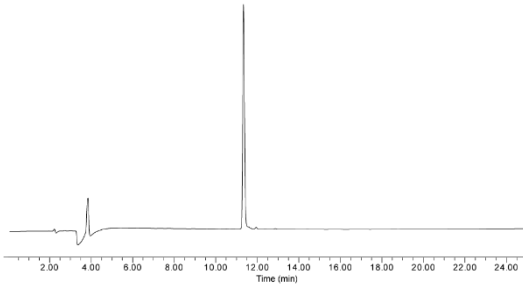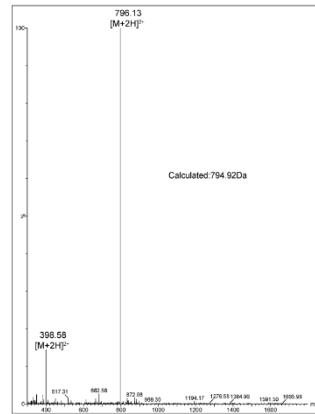

AHP-23: GGLSMTR

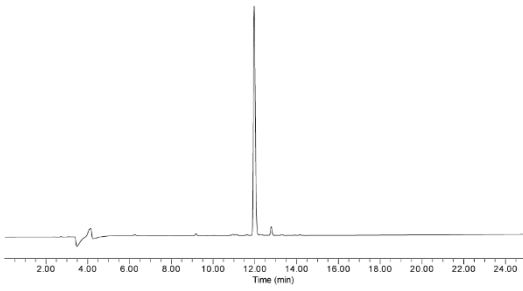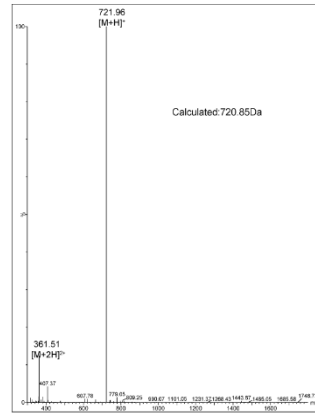

AHP-24: NHQRLLP

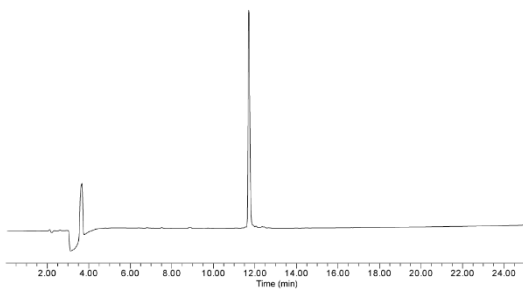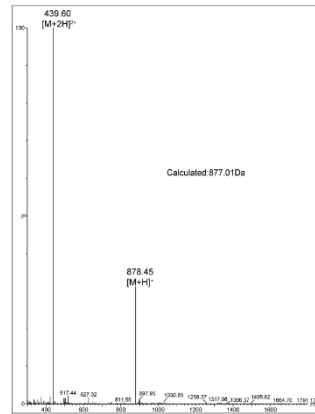

**Figure S12.** Characterization of twenty-four DR6-targeting peptides by HPLC ( $\lambda = 220$  nm) and ESI-MS.

AHP-D-03: D-(YLPAPLP)

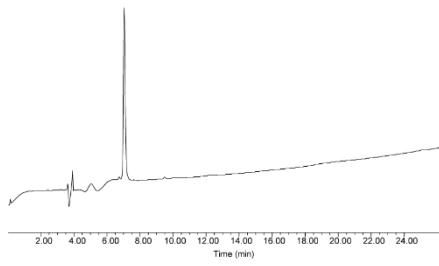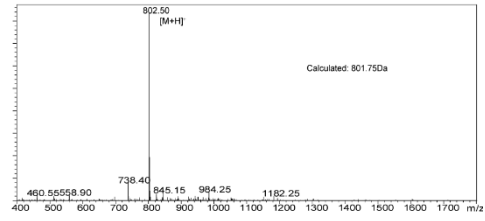

AHP-D-10: D-(NGSTHER)

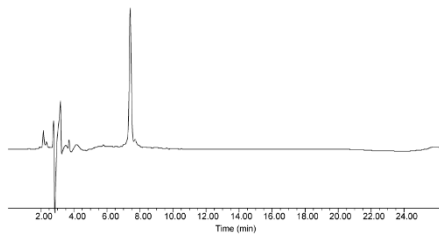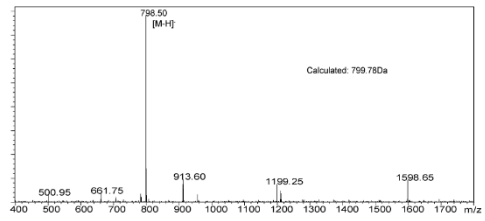

AHP-D-12: D-(TIDATTP)

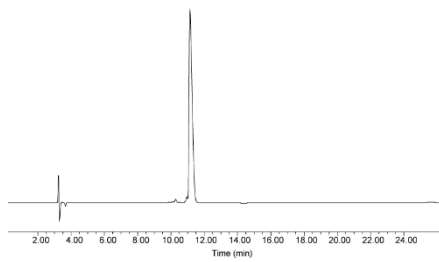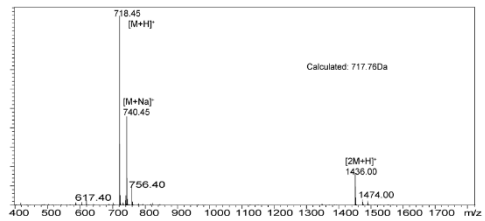

AHP-D-13: D-(SHTDTNQ)

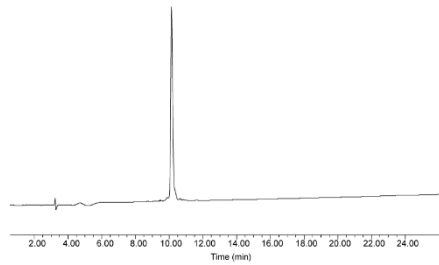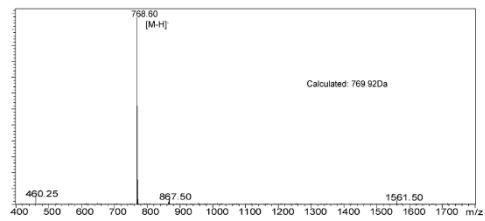

AHP-DRI-03: D-(PLPAPLY)

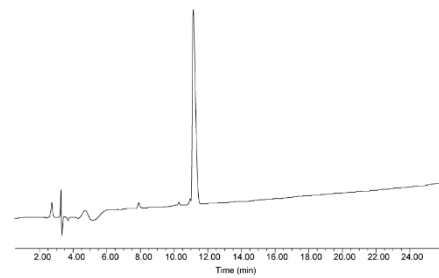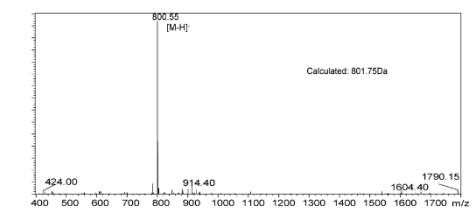

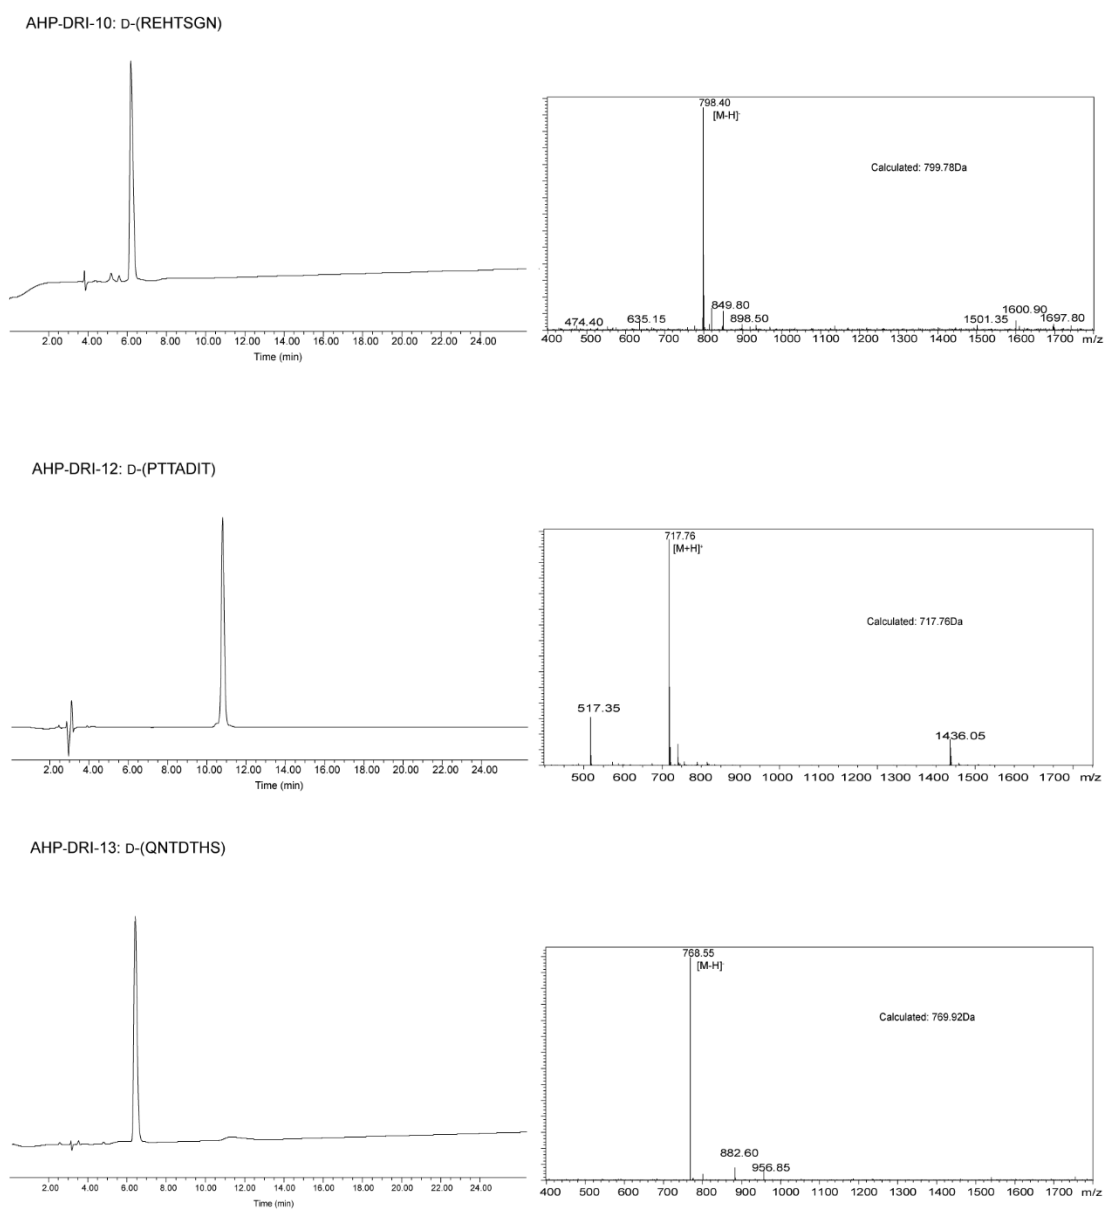

**Figure S13.** Characterization of D-peptides and DRI-peptides (totally composed of D amino acids) by HPLC ( $\lambda = 220$  nm) and ESI-MS.
